# Supplementary material
Source: bioRxiv or medRxiv preprint supplement (https://medrxiv.org/highwire/filestream/73257/field_highwire_adjunct_files/3/2020.03.06.19014944-4.pdf)
Supplement: Supplementary file [file 2020.03.06.19014944-4.pdf]

| Drug             | Indication (from CDF list)                                                                                                                                                                                                                                    | Licensed for this indication (according to the European Medicines Agency) (Y/N)? | Available to patients from (CDF) | old CDF drug remaining on new CDF list 15m Y, Y/B yes but has been reviewed, Not applicable because new drug | Listed after 1/1/18 | Managed Access Agreement (data collection arrangement and commercial arrangement) | Technology appraisal status None (N), Underway (U), Completed (C), Abandoned (A), ?? | NICE TA number or link to incomplete TA | Date of TA publication or expected date | Date on managed access agreement | Number of redacted areas (in addition to the commercial arrangement) | Text surrounding redaction | Description of clinical uncertainty in MA - P, I, C, O, E | Detail of uncertainty | Which study is anticipated to drive decision making next time the drug is appraised? (SACT (S), Trial (T), other (O)) | SACT study requested                                     | registration of the SACT study, link or mention of a protocol? | SACT outcomes | SACT data expected                      | clinical trial requested/ ongoing | name                             | Trial on registry Y/N? | outcome of prime interest to the NICE committee | other outcomes of interest | when are data expected? | other study maintained/req used? | routine commissioning, no NICE (typically "off label")                                                                                                                                                                                                                                                              |
|------------------|---------------------------------------------------------------------------------------------------------------------------------------------------------------------------------------------------------------------------------------------------------------|----------------------------------------------------------------------------------|----------------------------------|--------------------------------------------------------------------------------------------------------------|---------------------|-----------------------------------------------------------------------------------|--------------------------------------------------------------------------------------|-----------------------------------------|-----------------------------------------|----------------------------------|----------------------------------------------------------------------|----------------------------|-----------------------------------------------------------|-----------------------|-----------------------------------------------------------------------------------------------------------------------|----------------------------------------------------------|----------------------------------------------------------------|---------------|-----------------------------------------|-----------------------------------|----------------------------------|------------------------|-------------------------------------------------|----------------------------|-------------------------|----------------------------------|---------------------------------------------------------------------------------------------------------------------------------------------------------------------------------------------------------------------------------------------------------------------------------------------------------------------|
| Alecicmb         | Untreated anaplastic lymphoma kinase-positive advanced non-small-cell lung cancer                                                                                                                                                                             | Y                                                                                | 28/6/18                          | N                                                                                                            | Y                   | N                                                                                 | C                                                                                    | TA536                                   | 8/8/18                                  | NA                               | NA                                                                   | NA                         | NA                                                        | NA                    | NA                                                                                                                    | NA                                                       | NA                                                             | NA            | NA                                      | NA                                | NA                               | NA                     | NA                                              | NA                         | NA                      | NA                               | 1= old CDF+DCA, 2=new CDF drug+DCA, 3=old awaiting NICE, 4=old not for NICE, 5=new CDF no NICE, 6=after 1/1/18 entering commissioning via NICE, 7= old, no NICE and entering commissioning, 8=old, seen by NICE, for commissioning, 9= after 1/1/18 entering routine commissioning, no NICE (typically "off label") |
| Arsenic trioxide | Newly diagnosed low to intermediate risk acute promyelocytic leukaemia in CHILDREN                                                                                                                                                                            | N                                                                                | 4/6/18                           | N                                                                                                            | Y                   | N                                                                                 | N                                                                                    | NA                                      | NA                                      | NA                               | NA                                                                   | NA                         | NA                                                        | NA                    | NA                                                                                                                    | NA                                                       | NA                                                             | NA            | NA                                      | NA                                | NA                               | NA                     | NA                                              | NA                         | NA                      | NA                               | 6                                                                                                                                                                                                                                                                                                                   |
| Arsenic trioxide | Relapsed/refractory acute promyelocytic leukaemia in CHILDREN                                                                                                                                                                                                 | N                                                                                | 4/6/18                           | N                                                                                                            | Y                   | N                                                                                 | N                                                                                    | NA                                      | NA                                      | NA                               | NA                                                                   | NA                         | NA                                                        | NA                    | NA                                                                                                                    | NA                                                       | NA                                                             | NA            | NA                                      | NA                                | NA                               | NA                     | NA                                              | NA                         | NA                      | NA                               | 9                                                                                                                                                                                                                                                                                                                   |
| Arsenic trioxide | Newly diagnosed low to intermediate risk acute promyelocytic leukaemia in ADULTS                                                                                                                                                                              | Y                                                                                | 4/6/18                           | N                                                                                                            | Y                   | N                                                                                 | C                                                                                    | TA526                                   | 13/6/18                                 | NA                               | NA                                                                   | NA                         | NA                                                        | NA                    | NA                                                                                                                    | NA                                                       | NA                                                             | NA            | NA                                      | NA                                | NA                               | NA                     | NA                                              | NA                         | NA                      | NA                               | 6                                                                                                                                                                                                                                                                                                                   |
| Arsenic trioxide | Relapsed/refractory acute promyelocytic leukaemia in ADULTS                                                                                                                                                                                                   | Y                                                                                | 4/6/18                           | N                                                                                                            | Y                   | N                                                                                 | C                                                                                    | TA526                                   | 13/6/18                                 | NA                               | NA                                                                   | NA                         | NA                                                        | NA                    | NA                                                                                                                    | NA                                                       | NA                                                             | NA            | NA                                      | NA                                | NA                               | NA                     | NA                                              | NA                         | NA                      | NA                               | 6                                                                                                                                                                                                                                                                                                                   |
| Bendamustine     | Relapsed low grade lymphoma                                                                                                                                                                                                                                   | possibly                                                                         | 29/7/16                          | Y                                                                                                            | N                   | - but entering r                                                                  | N                                                                                    | NA                                      | NA                                      | NA                               | NA                                                                   | NA                         | NA                                                        | NA                    | NA                                                                                                                    | NA                                                       | NA                                                             | NA            | NA                                      | NA                                | NA                               | NA                     | NA                                              | NA                         | NA                      | NA                               | 4                                                                                                                                                                                                                                                                                                                   |
| Bendamustine     | Relapsed multiple myeloma                                                                                                                                                                                                                                     | possibly                                                                         | 29/7/16                          | Y                                                                                                            | N                   | - but entering r                                                                  | N                                                                                    | NA                                      | NA                                      | NA                               | NA                                                                   | NA                         | NA                                                        | NA                    | NA                                                                                                                    | NA                                                       | NA                                                             | NA            | NA                                      | NA                                | NA                               | NA                     | NA                                              | NA                         | NA                      | NA                               | 4                                                                                                                                                                                                                                                                                                                   |
| Bevacizumab      | Third line for low grade gliomas of childhood                                                                                                                                                                                                                 | N                                                                                | 29/7/16                          | Y                                                                                                            | N                   | N                                                                                 | N                                                                                    | NA                                      | NA                                      | NA                               | NA                                                                   | NA                         | NA                                                        | NA                    | NA                                                                                                                    | NA                                                       | NA                                                             | NA            | NA                                      | NA                                | NA                               | NA                     | NA                                              | NA                         | NA                      | NA                               | 4                                                                                                                                                                                                                                                                                                                   |
| Bevacizumab      | First line for recurrent or metastatic cervical cancer in combination with chemotherapy                                                                                                                                                                       | Y                                                                                | 29/7/16                          | Y                                                                                                            | N                   | N                                                                                 | N                                                                                    | NA                                      | NA                                      | NA                               | NA                                                                   | NA                         | NA                                                        | NA                    | NA                                                                                                                    | NA                                                       | NA                                                             | NA            | NA                                      | NA                                | NA                               | NA                     | NA                                              | NA                         | NA                      | NA                               | 4                                                                                                                                                                                                                                                                                                                   |
| Bevacizumab      | First line for advanced epithelial ovarian, fallopian tube, or primary peritoneal cancer                                                                                                                                                                      | Y                                                                                | 29/7/16                          | Y                                                                                                            | N                   | N                                                                                 | N                                                                                    | NA                                      | NA                                      | NA                               | NA                                                                   | NA                         | NA                                                        | NA                    | NA                                                                                                                    | NA                                                       | NA                                                             | NA            | NA                                      | NA                                | NA                               | NA                     | NA                                              | NA                         | NA                      | NA                               | 4                                                                                                                                                                                                                                                                                                                   |
| Bortezomib       | Bortezomib naive relapsed multiple myeloma                                                                                                                                                                                                                    | Y                                                                                | 29/7/16                          | Y                                                                                                            | N                   | N                                                                                 | N                                                                                    | NA                                      | NA                                      | NA                               | NA                                                                   | NA                         | NA                                                        | NA                    | NA                                                                                                                    | NA                                                       | NA                                                             | NA            | NA                                      | NA                                | NA                               | NA                     | NA                                              | NA                         | NA                      | NA                               | 4                                                                                                                                                                                                                                                                                                                   |
| Bortezomib       | Bortezomib-naive relapsed/refractory Hodgkin lymphoma following at least 2 prior therapies when autologous stem cell transplant or multiagent chemotherapy is not a treatment option in CHLD patient                                                          | ?                                                                                | 29/7/16                          | YB                                                                                                           | N                   | - but entering r                                                                  | N                                                                                    | NA                                      | NA                                      | 28/4/17                          | 0                                                                    | NA                         | NA                                                        | NA                    | NA                                                                                                                    | NA                                                       | NA                                                             | NA            | NA                                      | NA                                | NA                               | NA                     | NA                                              | NA                         | NA                      | NA                               | 7                                                                                                                                                                                                                                                                                                                   |
| Brentuximab      | Brentuximab-naive relapsed/refractory Hodgkin lymphoma following at least 2 prior therapies when autologous stem cell transplant or multiagent chemotherapy is not a treatment option in ADULT patients                                                       | ?                                                                                | 29/7/16                          | YB                                                                                                           | N                   | - but entering r                                                                  | N                                                                                    | TA524                                   | 28/6/17                                 | 28/4/17                          | 0                                                                    | NA                         | O                                                         | the proportion of S   | Y                                                                                                                     | retrospective ana stem cell transpl                      | Nov 2017                                                       | Y             | supported by the ?                      | ?                                 | ?                                | ?                      | Nov 2017                                        | Comparison in S            | 8                       |                                  |                                                                                                                                                                                                                                                                                                                     |
| Cabozantinib     | Treatment-naïve intermediate or poor risk advanced renal cell carcinoma                                                                                                                                                                                       | Y                                                                                | 24/8/18                          | N                                                                                                            | Y                   | N                                                                                 | C                                                                                    | TA463                                   | 9/8/17                                  | NA                               | NA                                                                   | NA                         | NA                                                        | NA                    | NA                                                                                                                    | NA                                                       | NA                                                             | NA            | NA                                      | NA                                | NA                               | NA                     | NA                                              | NA                         | NA                      | NA                               | 8                                                                                                                                                                                                                                                                                                                   |
| Cabozantinib     | First line for medullary thyroid cancer                                                                                                                                                                                                                       | Y                                                                                | 29/7/16                          | YB                                                                                                           | N                   | N                                                                                 | A                                                                                    | TA516                                   | March 28                                | NA                               | NA                                                                   | NA                         | NA                                                        | NA                    | NA                                                                                                                    | NA                                                       | NA                                                             | NA            | NA                                      | NA                                | NA                               | NA                     | NA                                              | NA                         | NA                      | NA                               | 8                                                                                                                                                                                                                                                                                                                   |
| Clofarabine      | Relapsed/refractory acute myeloblastic leukaemia                                                                                                                                                                                                              | N                                                                                | 29/7/16                          | Y                                                                                                            | N                   | N                                                                                 | N                                                                                    | NA                                      | NA                                      | NA                               | NA                                                                   | NA                         | NA                                                        | NA                    | NA                                                                                                                    | NA                                                       | NA                                                             | NA            | NA                                      | NA                                | NA                               | NA                     | NA                                              | NA                         | NA                      | NA                               | 4                                                                                                                                                                                                                                                                                                                   |
| Clofarabine      | Relapsed/refractory acute lymphoblastic leukaemia                                                                                                                                                                                                             | Y                                                                                | 29/7/16                          | YB                                                                                                           | N                   | N                                                                                 | A                                                                                    | https://www.nice                        | 1/12/16                                 | NA                               | NA                                                                   | NA                         | NA                                                        | NA                    | NA                                                                                                                    | NA                                                       | NA                                                             | NA            | NA                                      | NA                                | NA                               | NA                     | NA                                              | NA                         | NA                      | NA                               | 4                                                                                                                                                                                                                                                                                                                   |
| Clofarabine      | As part of 1st line therapy for high risk neuroblastoma in patients aged 12 months and above and who have both responded to induction chemotherapy and been treated with myeloablative therapy and stem cell transplantation                                  | Y                                                                                | 22/8/18                          | N                                                                                                            | Y                   | N                                                                                 | C                                                                                    | TA538                                   | 22/8/18                                 | NA                               | NA                                                                   | NA                         | NA                                                        | NA                    | NA                                                                                                                    | NA                                                       | NA                                                             | NA            | NA                                      | NA                                | NA                               | NA                     | NA                                              | NA                         | NA                      | NA                               | 6                                                                                                                                                                                                                                                                                                                   |
| Dihydroxymeth    | RELAPSED OR REFRACTORY neuroblastoma in patients aged 12 months and above and who have both responded to intensive induction chemotherapy used to treat high risk 1st line patients and been treated with myeloablative therapy and stem cell transplantation | Y                                                                                | 22/8/18                          | N                                                                                                            | Y                   | N                                                                                 | C                                                                                    | TA538                                   | 22/8/18                                 | NA                               | NA                                                                   | NA                         | NA                                                        | NA                    | NA                                                                                                                    | NA                                                       | NA                                                             | NA            | NA                                      | NA                                | NA                               | NA                     | NA                                              | NA                         | NA                      | NA                               | 6                                                                                                                                                                                                                                                                                                                   |
| Inotuzumab oxi   | Treatment of relapsed/refractory Philadelphia positive and negative B cell precursor acute lymphoblastic leukaemia in CHLD patients                                                                                                                           | N                                                                                | 9/8/18                           | N                                                                                                            | Y                   | N                                                                                 | U                                                                                    | possible GID-TA 719/8/18                | NA                                      | NA                               | NA                                                                   | NA                         | NA                                                        | NA                    | NA                                                                                                                    | NA                                                       | NA                                                             | NA            | NA                                      | NA                                | NA                               | NA                     | NA                                              | NA                         | NA                      | NA                               | 9                                                                                                                                                                                                                                                                                                                   |
| Inotuzumab oxi   | Relapsed/refractory Philadelphia positive and Philadelphia negative B cell precursor acute lymphoblastic leukaemia in ADULT patients                                                                                                                          | Y                                                                                | 9/8/18                           | N                                                                                                            | Y                   | N                                                                                 | U                                                                                    | GID-TA10091                             | 19/9/18                                 | NA                               | NA                                                                   | NA                         | NA                                                        | NA                    | NA                                                                                                                    | NA                                                       | NA                                                             | NA            | NA                                      | NA                                | NA                               | NA                     | NA                                              | NA                         | NA                      | NA                               | 6                                                                                                                                                                                                                                                                                                                   |
| Lenvatinib       | Differentiated thyroid cancer after radioactive iodine                                                                                                                                                                                                        | Y                                                                                | 15/2/18                          | N                                                                                                            | Y                   | N                                                                                 | C                                                                                    | TA535                                   | 8/8/18                                  | NA                               | NA                                                                   | NA                         | NA                                                        | NA                    | NA                                                                                                                    | NA                                                       | NA                                                             | NA            | NA                                      | NA                                | NA                               | NA                     | NA                                              | NA                         | NA                      | NA                               | 6                                                                                                                                                                                                                                                                                                                   |
| Lenvatinib       | Unresectable or metastatic, progressive, well differentiated and somatostatin receptor positive gastroenteropancreatic                                                                                                                                        | Y                                                                                | 20/7/18                          | N                                                                                                            | Y                   | N                                                                                 | C                                                                                    | TA539                                   | 29/8/18                                 | NA                               | NA                                                                   | NA                         | NA                                                        | NA                    | NA                                                                                                                    | NA                                                       | NA                                                             | NA            | NA                                      | NA                                | NA                               | NA                     | NA                                              | NA                         | NA                      | NA                               | 6                                                                                                                                                                                                                                                                                                                   |
| Midostaurin      | FLT3 mutation positive acute myeloid leukaemia in adults                                                                                                                                                                                                      | Y                                                                                | 4/6/18                           | N                                                                                                            | Y                   | N                                                                                 | C                                                                                    | TA523                                   | 13/6/18                                 | NA                               | NA                                                                   | NA                         | NA                                                        | NA                    | NA                                                                                                                    | NA                                                       | NA                                                             | NA            | NA                                      | NA                                | NA                               | NA                     | NA                                              | NA                         | NA                      | NA                               | 6                                                                                                                                                                                                                                                                                                                   |
| Nelarabine       | Refractory T-cell acute lymphoblastic leukaemia or refractory T-cell lymphoblastic non-Hodgkin's lymphoma                                                                                                                                                     | N                                                                                | 29/7/16                          | YB                                                                                                           | N                   | N                                                                                 | A                                                                                    | https://www.nice                        | 27/12/17                                | NA                               | NA                                                                   | NA                         | NA                                                        | NA                    | NA                                                                                                                    | NA                                                       | NA                                                             | NA            | NA                                      | NA                                | NA                               | NA                     | NA                                              | NA                         | NA                      | NA                               | 4                                                                                                                                                                                                                                                                                                                   |
| Oestratamab      | In combination with doxorubicin for the treatment of advanced soft tissue sarcoma in PAEDIATRIC patients                                                                                                                                                      | N                                                                                | 9/6/17                           | N                                                                                                            | N                   | N                                                                                 | ?                                                                                    | ?                                       | NA                                      | NA                               | NA                                                                   | NA                         | NA                                                        | NA                    | NA                                                                                                                    | NA                                                       | NA                                                             | NA            | NA                                      | NA                                | NA                               | NA                     | NA                                              | NA                         | NA                      | NA                               | 5                                                                                                                                                                                                                                                                                                                   |
| Palbocicb        | Untreated, hormone receptor-positive, HER2-negative, locally advanced or metastatic breast cancer                                                                                                                                                             | Y                                                                                | 16/11/17                         | N                                                                                                            | N                   | N                                                                                 | C                                                                                    | TA495                                   | 20/12/17                                | NA                               | NA                                                                   | NA                         | NA                                                        | NA                    | NA                                                                                                                    | NA                                                       | NA                                                             | NA            | NA                                      | NA                                | ?                                | ?                      | ?                                               | ?                          | ?                       | ?                                | 8                                                                                                                                                                                                                                                                                                                   |
| Pegylated Lipos  | Sarcoma (seems to be for those with cardiac problems)                                                                                                                                                                                                         | N                                                                                | 29/7/16                          | Y                                                                                                            | N                   | N                                                                                 | N                                                                                    | ?                                       | ?                                       | ?                                | ?                                                                    | ?                          | ?                                                         | ?                     | ?                                                                                                                     | ?                                                        | ?                                                              | ?             | ?                                       | ?                                 | ?                                | ?                      | ?                                               | ?                          | ?                       | ?                                | 4                                                                                                                                                                                                                                                                                                                   |
| Pembrolizumab    | Relapsed or refractory classical Hodgkin lymphoma in CHILDREN who are stem cell transplant-ineligible and have failed brentuximab vedotin                                                                                                                     | N                                                                                | 25/7/18                          | N                                                                                                            | Y                   | N                                                                                 | ?                                                                                    | ?                                       | ?                                       | ?                                | NA                                                                   | NA                         | NA                                                        | NA                    | NA                                                                                                                    | NA                                                       | NA                                                             | NA            | NA                                      | NA                                | NA                               | NA                     | NA                                              | NA                         | NA                      | NA                               | 9                                                                                                                                                                                                                                                                                                                   |
| Perfluzumab      | First line treatment of locally advanced or metastatic breast cancer                                                                                                                                                                                          | HER2 only                                                                        | 29/7/16                          | Y                                                                                                            | N                   | N                                                                                 | N                                                                                    | ?                                       | ?                                       | ?                                | ?                                                                    | ?                          | ?                                                         | ?                     | ?                                                                                                                     | ?                                                        | ?                                                              | ?             | ?                                       | ?                                 | ?                                | ?                      | ?                                               | ?                          | ?                       | ?                                | 8                                                                                                                                                                                                                                                                                                                   |
| Sorafenib        | Differentiated thyroid cancer after radioactive iodine                                                                                                                                                                                                        | Y                                                                                | 29/7/16                          | YB                                                                                                           | N                   | N                                                                                 | N                                                                                    | TA535                                   | 8/8/18                                  | NA                               | NA                                                                   | NA                         | NA                                                        | NA                    | NA                                                                                                                    | NA                                                       | NA                                                             | NA            | NA                                      | NA                                | NA                               | NA                     | NA                                              | NA                         | NA                      | NA                               | 8                                                                                                                                                                                                                                                                                                                   |
| Vandetanib       | First line treatment of medullary thyroid cancer                                                                                                                                                                                                              | Y                                                                                | 29/7/16                          | YB                                                                                                           | N                   | N                                                                                 | U                                                                                    | https://www.nice                        | 19/12/18                                | NA                               | NA                                                                   | NA                         | NA                                                        | NA                    | NA                                                                                                                    | NA                                                       | NA                                                             | NA            | NA                                      | NA                                | NA                               | NA                     | NA                                              | NA                         | NA                      | NA                               | 3                                                                                                                                                                                                                                                                                                                   |
| Atezolizumab     | Locally advanced or metastatic urothelial cancer in patients who are ineligible for cisplatin based chemotherapy                                                                                                                                              | Y                                                                                | 1/11/17                          | N                                                                                                            | N                   | Y                                                                                 | C                                                                                    | TA492                                   | 6/12/18                                 | 12/7/18                          | 3                                                                    | in the trial proto C, O, E | OS and PFS con T                                          | Y                     | N                                                                                                                     | OS, duration of t                                        | Dec 2020                                                       | Y             | IMvigor 130                             | Y                                 | OS, PFS, treatm                  | NA                     | Dec 2020                                        | NA                         | 2                       |                                  |                                                                                                                                                                                                                                                                                                                     |
| Crizotinib       | 1st or subsequent line systemic therapy for ROS1-positive inoperable locally advanced/metastatic non squamous non-small cell lung cancer                                                                                                                      | Y                                                                                | 31/6/18                          | N                                                                                                            | Y                   | Y                                                                                 | C                                                                                    | TA529                                   | 4/7/18                                  | July 2018                        | 2                                                                    | dates when trials C, O     | Lack of compar S                                          | Y                     | Y                                                                                                                     | Treatment durati 2023 (driven by e baseline charact data | ?                                                              | NA            | PROFILE 1001 (Y                         | OS                                | Objective respon                 | April 2023             | Clinical trial OxC Asian patients in            | 2                          |                         |                                  |                                                                                                                                                                                                                                                                                                                     |
| Daratumumab      | Relapsed and refractory multiple myeloma                                                                                                                                                                                                                      | Y                                                                                | 17/1/18                          | N                                                                                                            | Y                   | Y                                                                                 | C                                                                                    | TA510                                   | 14/3/18                                 | March 2018                       | 0                                                                    | NA                         | O                                                         | Os in a UK popul S    | Y                                                                                                                     | N                                                        | Pre-progression 01/11/2019-20                                  | Y             | Phase 2 registrati Y - https://clinical | OS                                | longer term survi                | Aug 2018               | isease-specific W                               | 2                          |                         |                                  |                                                                                                                                                                                                                                                                                                                     |
| Ibrutinib        | Waldenström's Macroglobulinaemia                                                                                                                                                                                                                              | Y                                                                                | 18/9/17                          | N                                                                                                            | N                   | Y                                                                                 | C                                                                                    | TA461                                   | 22/11/17                                | sept 17                          | 0                                                                    | NA                         | O                                                         | magnitude of the T    | Y                                                                                                                     | N                                                        | OS, Duration of t                                              | Dec 19        | Y                                       | Phase III TOUR, I                 | progression-free OS and OS in pa | Dec 2019               | Data from UK NA                                 | 2                          |                         |                                  |                                                                                                                                                                                                                                                                                                                     |
| Ixabromb (with   | Maintenance for relapsed, platinum-sensitive and high grade serous ovarian, fallopian tube or primary peritoneal carcinoma who are in response following platinum-based SECOND line chemotherapy and who HAVE a germline BRCA mutation                        | Y                                                                                | 1/6/18                           | N                                                                                                            | N                   | Y                                                                                 | C                                                                                    | TA523                                   | 4/7/18                                  | NA                               | 0                                                                    | NA                         | O                                                         | mature OS data, T     | Y                                                                                                                     | N                                                        | overall survival, e as trial                                   | Y             | pivotal ENGOT-CY                        | Mature OS                         | PFS, QOL, time i                 | June 2020              | NA                                              | 2                          |                         |                                  |                                                                                                                                                                                                                                                                                                                     |
